# Supplementary material
Source: publisher figshare collection journal article supplement (https://tandf.figshare.com/ndownloader/files/18736823)
Supplement: Supplementary file 1 [file 18736823]

**Supplementary material**

**Supplementary Table 1: Results of the nursing home admission model excluding individuals with dementia or hip fractures**

|  | **PD status only** | | **Adding demographics** | | **Adding activities** | |
| --- | --- | --- | --- | --- | --- | --- |
|  | **OR**  **(95%CI)** | **OR**  **(95%CI)** | | | **OR**  **(95%CI)** | |
| **Demographicsa** | N | Y | | | Y | |
| **PD, non-advanced** | 2.30*** (1.55-3.43) | 1.94***  (1.23-3.06) | | | 1.43  (0.86-2.37) | |
| **APD** | 8.17*** (5.38-12.39) | 5.09***  (2.92-8.89) | | | 1.63  (0.89-2.99) | |
| **Difficulty with:b** |  |  | |  |  |  |
| Walking |  |  | |  | 1.73***  (1.43-2.08) | |
| Dressing |  |  | |  | 1.08  (0.87-1.34) | |
| Going to the toilet |  |  | |  | 1.32**  (1.05-1.65) | |
| Getting out of bed/chair |  |  | |  | 1.24**  (1.02-1.51) | |
| Using a phone |  |  | |  | 1.00  (0.80-1.24) | |
| Paying bills |  |  | |  | 2.59***  (2.05-3.27) | |
| Light housework |  |  | |  | 1.51***  (1.22-1.86) | |
| Heavy housework |  |  | |  | 1.49***  (1.23-1.81) | |

Notes: aIncluded demographics are indicators for male, non-Hispanic black, Hispanic, high school graduate, college graduate or more, current smoker, widow. In addition, age is included as a covariate.

bHaving difficulty with a certain activity is a yes/no question.

Statistically significant at ***p<0.01; **p<0.05; *p<0.1.

Abbreviations are: APD = advanced Parkinson’s disease, PD = Parkinson’s disease, OR = Odds ratio, CI = Confidence interval

**Supplementary Table 2. Risk of nursing home admission in individuals with advanced Parkinson’s disease and Parkinson’s disease, excluding those with dementia and hip fractures, in the Medicare Current Beneficiary Survey**

| Disease status | Absolute NHA risk (%) | Risk relative to non-PD | Risk relative to non-advanced PD |
| --- | --- | --- | --- |
| Non-PD | 0.9% | -- | -- |
| Non-advanced PD | 2.2% | 2.4 | -- |
| APD | 5.9% | 9.3 | 2.7 |

Notes: Abbreviations are: APD = advanced Parkinson’s disease, NHA = nursing home admission, PD = Parkinson’s disease.

**Supplementary Fig 1: The effect of levodopa-carbidopa intestinal gel on nursing home admission risk under different treatment scenarios in the advanced Parkinson’s disease population, excluding individuals with dementia and hip fractures**

Notes: The baseline scenario applies to patients with APD on standard of care (optimized oral levodopa-carbidopa IR). The other scenarios apply to patients with APD on levodopa-carbidopa intestinal gel. Abbreviations are: APD = advanced Parkinson’s disease, NHA = nursing home admission.

.
